# Supplementary material for: Early Feasibility Assessment: A Method for Accurately Predicting Biotherapeutic Dosing to Inform Early Drug Discovery Decisions
Source: PubMed Central journal article supplement (PMC9214263; doi:10.3389/fphar.2022.864768), 2022-06-08
Supplement: DataSheet3.pdf [file DataSheet3.pdf]

## Supplementary Material

### 1 Supplementary Figures and Tables

#### 1.1 Supplementary Figures

**Figure S1.** Monospecific Anti-Receptor Model Diagram. Figure was created using BioRender.com.

#### 2-Compartment Monospecific Anti-Receptor Biotherapeutic: Pharmacology Drawing

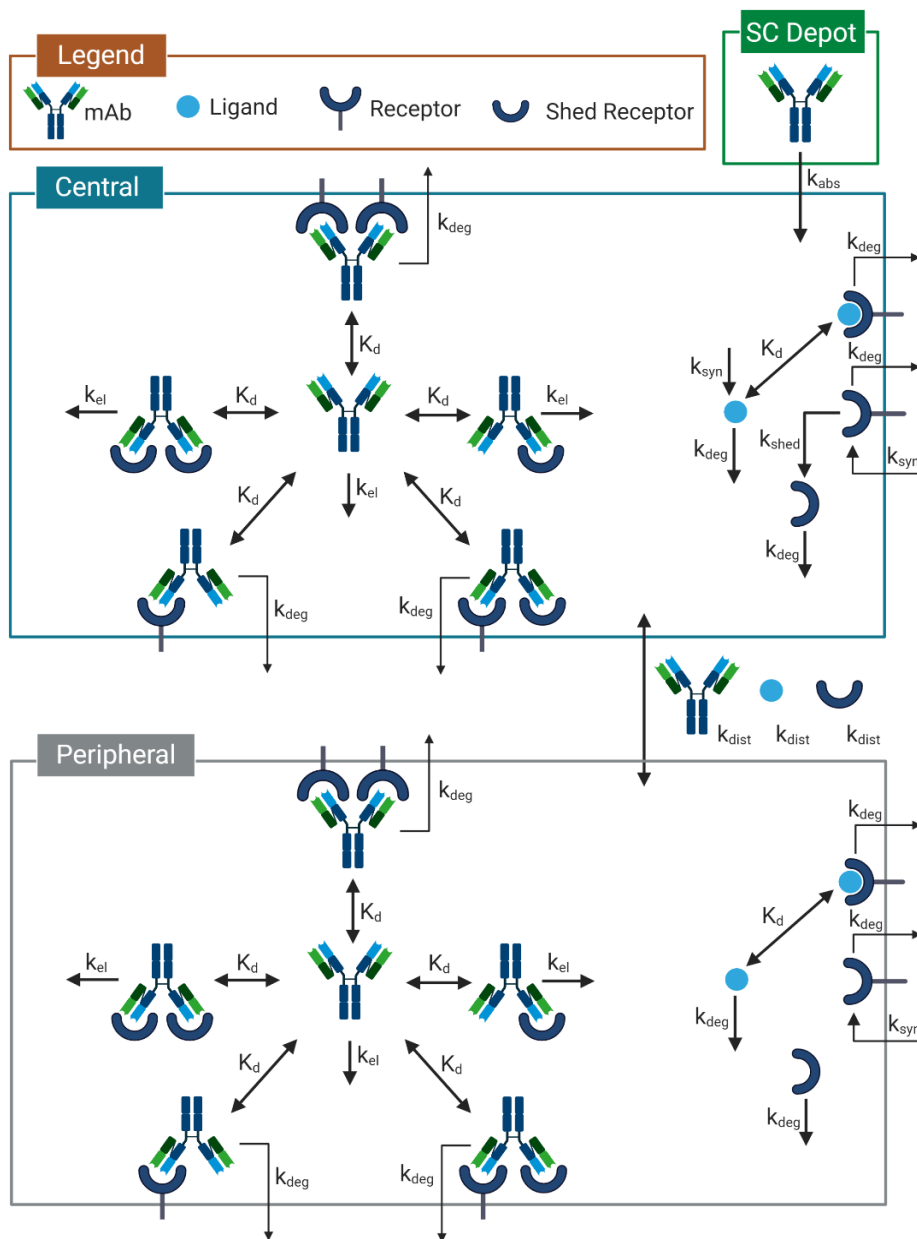

**Figure S2.** Bispecific Anti-Receptor x Anti-Receptor Model Diagram. Figure was created using BioRender.com.

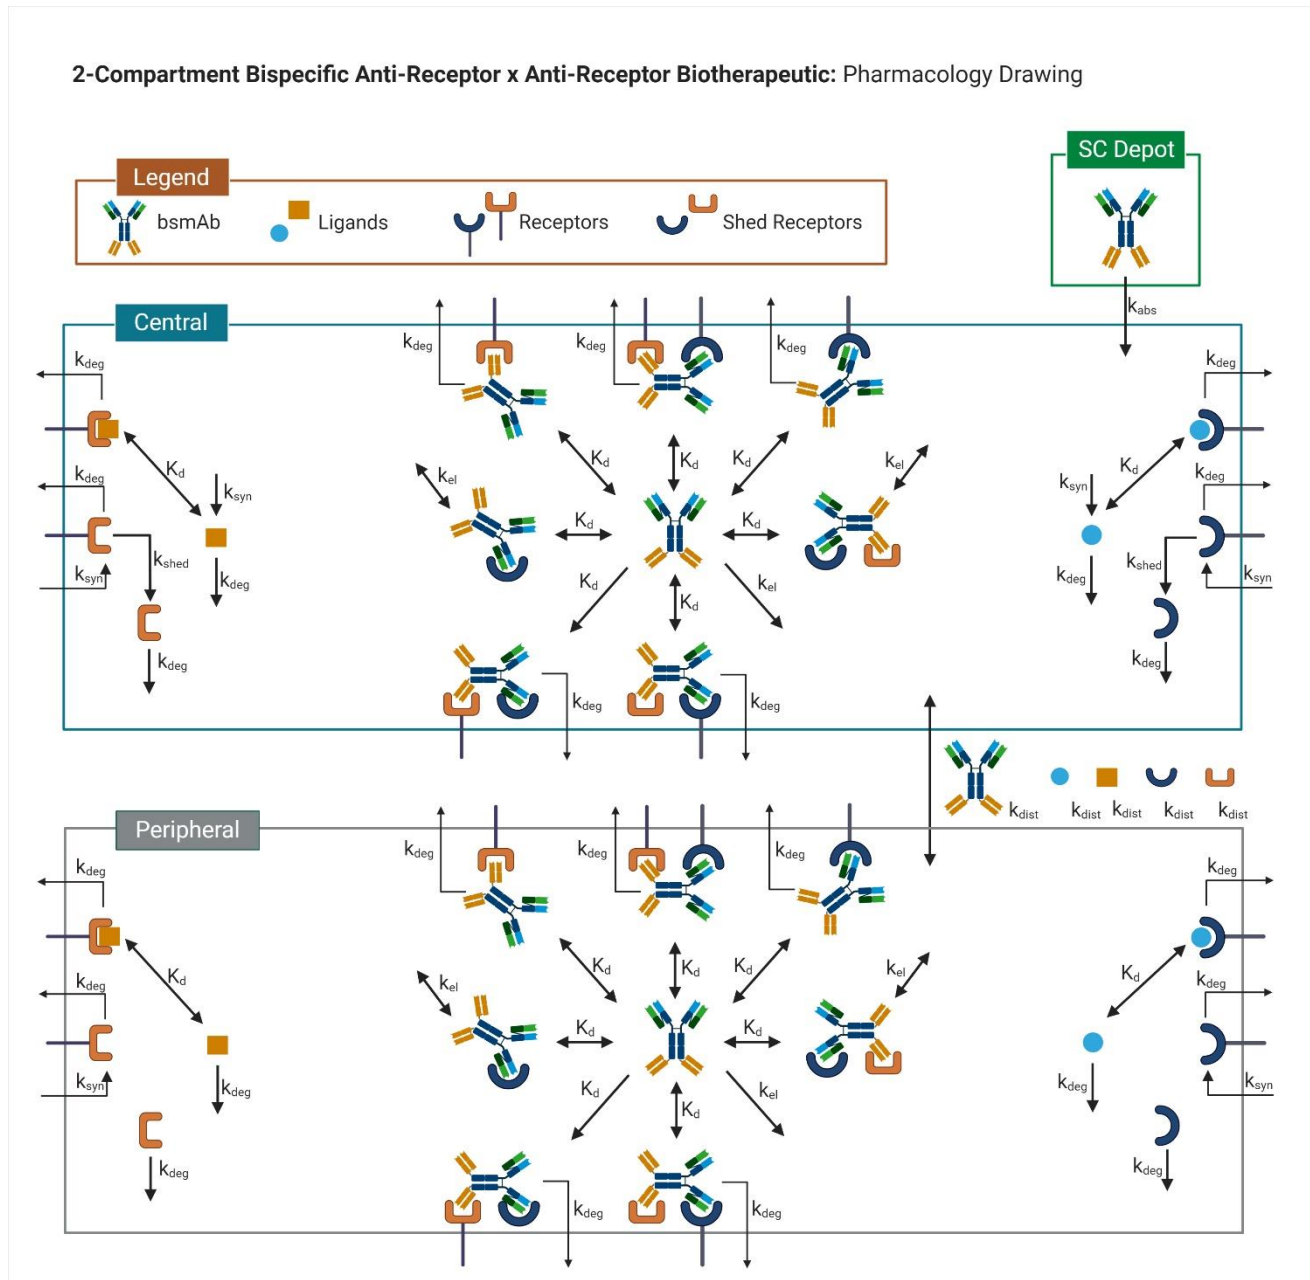

## 1.2 Supplementary Tables

**Table S1. Adalimumab Parameter Scan Results**

| Parameter Description       | Unit | Scan Range          | ID90 Range (mg) | ID90 Fold-range |
|-----------------------------|------|---------------------|-----------------|-----------------|
| Adalimumab molecular weight | Da   | 49333 - 444000      | 13.1 - 118      | 9.0             |
| Volume                      | L    | 1.67 - 15           | 13.1 - 118      | 8.9             |
| Adalimumab KD               | nM   | 0.0027 - 0.024      | 14.6 - 114      | 7.8             |
| TNF Half-Life               | min  | 10 - 90             | 19.5 - 99.4     | 5.1             |
| Adalimumab Half-Life        | days | 6.67 - 60           | 35.2 - 57.0     | 1.6             |
| TNFR Concentration          | nM   | 0.077 - 0.69        | 39.4 - 58.4     | 1.5             |
| TNFR receptor half-life     | min  | 180 - 1620          | 34.7 - 44.0     | 1.3             |
| TNF:TNFR KD                 | nM   | 0.006 - 0.057       | 35 - 43.7       | 1.2             |
| SC Absorption half-life     | days | 0.83 - 7.5          | 36.5 - 42.8     | 1.2             |
| TNF Concentration           | nM   | 1.92E-05 - 1.73E-04 | 39.4 - 39.6     | 1.0             |

**Table S2. Infliximab Parameter Scan Results**

| Parameter Description       | Unit | Scan Range      | ID90 Range (mg) | ID90 Fold-range |
|-----------------------------|------|-----------------|-----------------|-----------------|
| Infliximab Half-Life        | days | 4.67 - 42       | 128 - 40000     | 310             |
| Infliximab molecular weight | Da   | 49667 - 447000  | 148 - 1330      | 9.0             |
| Volume                      | L    | 1.67 - 15       | 148 - 1330      | 9.0             |
| Infliximab KD               | nM   | 0.0014 - 0.0126 | 182 - 1230      | 6.8             |
| TNF Half-Life               | min  | 10 - 90         | 219 - 1120      | 5.1             |
| SC Absorption half-life     | days | 0.83 - 7.5      | 270 - 509       | 1.9             |

Early Feasibility Assessment Supplementary Material

|                         |     |                     |           |     |
|-------------------------|-----|---------------------|-----------|-----|
| TNFR Concentration      | nM  | 0.077 - 0.69        | 444 - 658 | 1.5 |
| TNFR receptor half-life | min | 180 - 1620          | 390 - 496 | 1.3 |
| TNF:TNFR KD             | nM  | 0.006 - 0.057       | 395 - 492 | 1.2 |
| TNF Concentration       | nM  | 1.92E-05 - 1.73E-04 | 444 - 446 | 1.0 |

**Table S3. Ustekinumab (IL12/ IL23) Model Parameters**

| Parameter             | Value   | Unit  | Reference                          | Notes                                                                                                                                                              |
|-----------------------|---------|-------|------------------------------------|--------------------------------------------------------------------------------------------------------------------------------------------------------------------|
| Drug Valency          | 2       | -     | Benson (2011)<br>PMID:<br>22123062 | Through isothermal titration calorimetry analysis, ustekinumab was shown to bind IL-12 and IL-23 equally, with the expected 2:1 antigen-to-antibody stoichiometry. |
| Drug Dosing Interval  | 12      | weeks | Stelara Label                      | 45 mg (>60 to ≤100 kg subjects) or 90mg (≥100 kg) s.c. initially and 4 weeks later, followed by 45 mg every 12 weeks*                                              |
| Drug Half Life        | 21.6    | days  | Zhu (2009)<br>PMID:<br>19179295    | Consistent with Gottlieb 2007 and Kauffman 2004                                                                                                                    |
| Drug Molecular Weight | 148,600 | Da    | CAS #:<br>815610-63-0              |                                                                                                                                                                    |
| Ustekinumab KD        | 1       | pM    | Luo (2010)<br>PMID:<br>20691190    | Exceeds the isothermal titration calorimetry limits. Assume < 10 pM as 1 pM                                                                                        |
| p-40 Concentration    | 1.9     | pmols |                                    | Bottom-up estimate                                                                                                                                                 |

Early Feasibility Assessment Supplementary Material

|                          |     |       |                               |                                                                                                                                                                          |
|--------------------------|-----|-------|-------------------------------|--------------------------------------------------------------------------------------------------------------------------------------------------------------------------|
| p-40 Half Life           | 1.5 | hrs   | Lotze (1985)<br>PMID: 3871099 | IL-12: 5-10 h (Lotze 1996 PMID: 8958977) (which may be high and influenced by engineered properties of recombinant IL-12); IL-23 not found. Assume 1.5 h (based on IL-2) |
| p-40:Receptor KD         | 10  | pM    | Ma (2001)<br>PMID: 11680011   | Both high-affinity (Kd=5–20 pM, 100–1000 sites per cell) and low- affinity (Kd=2–6 nM, 1000–5000 sites per cell).                                                        |
| Receptor Concentration   | 61  | pmols |                               | Bottom-up estimate                                                                                                                                                       |
| Receptor Internalization | 2   | hrs   |                               | Standard assumption                                                                                                                                                      |
| Volume                   | 5   | L     | -                             | Standard PK assumption. The typical volume of distribution for antibody drugs is 5L.                                                                                     |
| Body Weight              | 70  | kg    | -                             | Standard PK assumption.                                                                                                                                                  |

**Table S4. Risankizumab (IL23) Model Parameters**

| Parameter            | Value | Unit  | Reference                      | Notes                                                                             |
|----------------------|-------|-------|--------------------------------|-----------------------------------------------------------------------------------|
| Drug Valency         | 2     | -     | assumed as monoclonal antibody |                                                                                   |
| Drug Dosing Interval | 12    | weeks | Gordon (2018) PMID: 30097359   | 150 mg s.c.at weeks 0, 4, 16, 28, and 40 (Ph3 dose); assume longest last interval |

Early Feasibility Assessment Supplementary Material

|                          |         |       |                                                                                                                                |                                                                                      |
|--------------------------|---------|-------|--------------------------------------------------------------------------------------------------------------------------------|--------------------------------------------------------------------------------------|
| Drug Half Life           | 27      | days  | Suleiman (2019) PMID: 30123942                                                                                                 | Includes patients with psoriasis and Crohn's disease                                 |
| Drug Molecular Weight    | 145,610 | Da    | KEGG entry <a href="https://www.genome.jp/dbget-bin/www_bget?dr:D11052">https://www.genome.jp/dbget-bin/www_bget?dr:D11052</a> |                                                                                      |
| Risankizumab KD          | 1       | pM    | Singh (2015) PMID: 25905918                                                                                                    | assumed < 10 pM, from Table 1; use 1 pM                                              |
| p-19 Concentration       | 872     | pM    |                                                                                                                                | Bottom up-estimate                                                                   |
| p-19 Half Life           | 1.5     | hr    | Lotze (1985) PMID 3871099                                                                                                      | Assumed similar to IL-2                                                              |
| p-19:Receptor KD         | 1.6     | nM    | Parham (2002) PMID: 12023369                                                                                                   | Estimated Kd range (0.3-3nM) based on ELISA binding assay; Figure 4                  |
| Receptor Concentration   | 4.4     | nmols |                                                                                                                                | Bottom-up                                                                            |
| Receptor Internalization | 2       | h     |                                                                                                                                | Standard Assumption                                                                  |
| Volume                   | 5       | L     | -                                                                                                                              | Standard PK assumption. The typical volume of distribution for antibody drugs is 5L. |

|             |    |    |   |                         |
|-------------|----|----|---|-------------------------|
| Body Weight | 70 | kg | - | Standard PK assumption. |
|-------------|----|----|---|-------------------------|

**Table S5. Belimumab (BAFF) Model Parameters**

| Parameter             | Value         | Unit  | Reference                                                                                | Notes                                                                                                                                       |
|-----------------------|---------------|-------|------------------------------------------------------------------------------------------|---------------------------------------------------------------------------------------------------------------------------------------------|
| Drug Valency          | 1             | -     | Shin (2018) PMID: 29572471                                                               | BAFF forms a homotrimer and binds to belimumab with 3:3 stoichiometry                                                                       |
| Drug Dosing Interval  | 7             | days  | Benlysta label                                                                           | 10 mg/kg i.v. BIW x3 then Q4W; or 200 mg s.c. QW; use the 1 week sc                                                                         |
| Drug Half Life        | 19.4          | days  | SumR BLA; PharmR BLA                                                                     | 19.4 d (10mg/kg dose); linear PK                                                                                                            |
| Drug Molecular Weight | 147,000       | Da    | Goldenberg (2011) PMID: 21785542                                                         |                                                                                                                                             |
| Belimumab KD          | 274           | pM    | PharmaR BLA                                                                              |                                                                                                                                             |
| BAFF Concentration    | 1.47          | nmols |                                                                                          | SLE patient BAFF levels central and peripheral compartments are 0.307 and 1.16 nmoles, respectively. Total body soluble BAFF is 1.47 nmoles |
| BAFF Half Life        | 60            | min   | Moritz (1989) PMID: 2720707                                                              | 60 min (54-70 min) based on TNFalpha at the higher doses, 11 -17 mins at 0.04 mg/m2)                                                        |
| BAFF:Receptor KD      | 15; 1550; 1.3 | KD    | Day (2005) PMID: 15697217; Cachero (2006) PMID: 16475789; Hymowitz (2005) PMID: 15542592 | BAFF binds to BAFF-R, BCMA, and TACI with 15-16, 1550, and 1.3 nM KDs, respectively                                                         |

Early Feasibility Assessment Supplementary Material

|                          |     |       |                     |                                                                                                                                                                                                                                                                |
|--------------------------|-----|-------|---------------------|----------------------------------------------------------------------------------------------------------------------------------------------------------------------------------------------------------------------------------------------------------------|
| Receptor Concentration   | 290 | pmols |                     | Total BAFF-R, BCMA, and TACI in SLE patient blood is 5.7, 0.36, and 0.24 pmols, respectively. Total BAFF-R, BCMA, and TACI in the peripheral compartment of SLE patients is 260, 16, and 11 pmols, respectively. Total body BAFF binding partner is 290 pmols. |
| Receptor Internalization | 2   | h     | Standard Assumption |                                                                                                                                                                                                                                                                |
| Volume                   | 5   | L     | -                   | Standard PK assumption. The typical volume of distribution for antibody drugs is 5L.                                                                                                                                                                           |
| Body Weight              | 70  | kg    | -                   | Standard PK assumption.                                                                                                                                                                                                                                        |

**Table S6. Omalizumab (IgE) Model Parameters**

| Parameter            | Value | Unit | Reference                          | Notes                                                                                                                                                                                                 |
|----------------------|-------|------|------------------------------------|-------------------------------------------------------------------------------------------------------------------------------------------------------------------------------------------------------|
| Drug Valency         | 2     | -    | Davies (2017)<br>PMID:<br>28438838 | Crystal studies suggest omalizumab can bind with a 2:1 stoichiometry to target, or sometimes 2:2 or 3:3                                                                                               |
| Drug Dosing Interval | 14    | days | Omalizumab label                   | 150-375 mg s.c. Q2W or Q4W. <i>Dose varies by weight and IgE serum levels.</i> For 70kg patient, dosed 150 and 300mg for 30-100 and 100-200 IU/mL IgE, respectively.* 1 IU/mL is equal to 2.4ng/mL.** |
| Drug Half Life       | 26    | days | Omalizumab label                   |                                                                                                                                                                                                       |



Early Feasibility Assessment Supplementary Material

|                       |        |       |                                                       |                                                                                                                                                                                                                                                                                                                                                                                                              |
|-----------------------|--------|-------|-------------------------------------------------------|--------------------------------------------------------------------------------------------------------------------------------------------------------------------------------------------------------------------------------------------------------------------------------------------------------------------------------------------------------------------------------------------------------------|
| Drug Molecular Weight | 149000 | Da    | Omalizumab label                                      |                                                                                                                                                                                                                                                                                                                                                                                                              |
| Omalizumab KD         | 20     | pM    | Chang (2000) PMID: 10657120; Kolbinger (1993) 8309946 | 0.1 nM, but can be higher affinity due to avidity of anti-IgE:IgE immune complexes (2:2 or 3:3) <sup>§†</sup> , assume 20 pM                                                                                                                                                                                                                                                                                 |
| IgE Concentration     | 40     | nmols |                                                       | Use IgE plasma concentration corresponding to measured receptor density in same set of patients (222 IU/ml or 533ng/ml #, range within study <20–500 IU/ml †). free IgE levels in central and peripheral are 8.4 and 32 nmoles, respectively. May be a high estimate due to serum dilution. Also, levels of membrane-bound IgE on B cells not found and assumed to be zero. Total body free IgE is 40 nmoles |
| IgE Half Life         | 2      | days  | Corne (1997) PMID: 9062345                            | Complex half-lives may be about 10 days                                                                                                                                                                                                                                                                                                                                                                      |
| IgE:Receptor KD       | 0.12   | nM    | Miller (1989) PMID: 2523561                           | FCεRI binding in transfected cells                                                                                                                                                                                                                                                                                                                                                                           |

Early Feasibility Assessment Supplementary Material

|                          |     |       |                     |                                                                                                                                                                                                                                                                                                                                                                                                                                                                                                                                                                                                                                                                                                                                                          |
|--------------------------|-----|-------|---------------------|----------------------------------------------------------------------------------------------------------------------------------------------------------------------------------------------------------------------------------------------------------------------------------------------------------------------------------------------------------------------------------------------------------------------------------------------------------------------------------------------------------------------------------------------------------------------------------------------------------------------------------------------------------------------------------------------------------------------------------------------------------|
| Receptor Concentration   | 3.9 | nmols |                     | Bottom up calculation of FCεRI expression on basophils and mast Cells. Assume levels of other FCεRI expressing cells (dendritic cells, Langerhans cells, macrophages, and eosinophils) are negligible. FCεRI expression on basophils in central and peripheral compartments is 0.054 and 2.4 pmoles, respectively. FCεRI expression on mast cells in peripheral compartment is 1.4 nmoles. Total body FCεRI expression is 3.9 nmoles. NOTE: Treatment with the anti-IgE mAbs results in a marked down-regulation of FcεRI on basophils. Median pretreatment densities of FcεRI were -220,000 receptors per basophil and after 3 mo of treatment, the densities had decreased to a median of 8,300 receptors per basophil MacGlashan (1997) PMID: 9013989 |
| Receptor Internalization | 2   | hr    | standard assumption | Try both occupancy of soluble IgE (no receptor turnover) and IgE/FcεRI inh (2 h). IgE binding to FcεRI thought to inhibit endocytosis in mast cells and basophils but not monocytes or dendritic cells.                                                                                                                                                                                                                                                                                                                                                                                                                                                                                                                                                  |
| Volume                   | 5   | L     | -                   | Standard PK assumption. The typical volume of distribution for antibody drugs is 5L.                                                                                                                                                                                                                                                                                                                                                                                                                                                                                                                                                                                                                                                                     |
| Body Weight              | 70  | kg    | -                   | Standard PK assumption.                                                                                                                                                                                                                                                                                                                                                                                                                                                                                                                                                                                                                                                                                                                                  |

**Table S7. Trastuzumab (HER2) Model Parameters**

| Parameter | Value | Unit | Reference | Notes |
|-----------|-------|------|-----------|-------|
|-----------|-------|------|-----------|-------|

Early Feasibility Assessment Supplementary Material

|                                          |          |      |                                                                                   |                                                                                                              |
|------------------------------------------|----------|------|-----------------------------------------------------------------------------------|--------------------------------------------------------------------------------------------------------------|
| Drug Valency                             | 2        | -    | assumed as monoclonal antibody                                                    |                                                                                                              |
| Drug Dosing Interval                     | 7        | days | Herceptin Label                                                                   | For metastatic HER2-Overexpressing Breast Cancer: Initial dose of 4 mg/kg followed by weekly doses of 2mg/kg |
| Drug Half Life                           | 25       | days | Quartino (2019) PMID: 30467591                                                    | From pop-PK analysis                                                                                         |
| Drug Molecular Weight                    | 145531   | Da   |                                                                                   |                                                                                                              |
| Trastuzumab KD                           | 0.1      | nM   | Li (2013) PMID: 24046294; Troise (2008) PMID:18795950                             | Apparent Kd from binding to ErbB2-ECD. Values can vary depending on assay.                                   |
| HER2 expression central                  | 3.60E-04 | nM   | You (2008) PMID: 18577250, Suzuki (2015) PMID: 25655677                           | bottom-up calculation                                                                                        |
| HER2 expression peripheral               | 5.89E-02 | nM   | Li (2019) PMID: 31185215, Onsum (2013) PMID: 24035511, Ruiz (2018) PMID: 30282693 | bottom-up calculation                                                                                        |
| HER2 receptor half-life                  | 24       | hr   | Pereira (2018) PMID: 30510281                                                     | in vitro assay in the presence of cyclohexamide                                                              |
| soluble Her2 receptor expression central | 7        | nM   | Baselga (2001) PMID: 11521722                                                     | Patient plasma levels. Wide range observed. High levels result in higher clearance of mAb                    |
| soluble Her2 receptor                    | 7        | nM   | Assumed equal to central                                                          |                                                                                                              |

Early Feasibility Assessment Supplementary Material

|                                 |    |    |                                                       |                                           |
|---------------------------------|----|----|-------------------------------------------------------|-------------------------------------------|
| expression peripheral           |    |    |                                                       |                                           |
| soluble Her2 receptor half-life | 1  | hr | Betts (2020) PMID: 32710210, Li (2014) PMID: 24477089 | Estimates from PBPK models                |
| Central compartment volume      | 3  | L  | Shah and Betts 2012                                   | Plasma volume                             |
| Peripheral compartment volume   | 13 | L  | Shah and Betts 2012                                   | Interstitial volume of peripheral tissues |
| Body weight                     | 70 | kg | -                                                     | Standard PK assumption.                   |
